# Supplementary material for: Identification of candidate diagnostic serum biomarkers for Kawasaki disease using proteomic analysis
Source: PubMed Central journal article supplement (PMC5338030; doi:10.1038/srep43732), 2017-03-06
Supplement: srep43732-s1.pdf [file srep43732-s1.pdf]

Identification of candidate diagnostic serum biomarkers for Kawasaki disease using proteomic analysis  
Yayoi Kimura, Masakatsu Yanagimachi, Yoko Ino, Mao Aketagawa, Michie Matsuo, Akiko Okayama, Hiroyuki Shimizu, Kunihiro Oba, Ichiro Morioka, Tomoyuki Imagawa, Tetsuji Kaneko, Shumpei Yokota, Hisashi Hirano, Masaaki Mori

**Figure S1. A schematic overview of the MS-based proteomic analysis workflow.**

The procedure used for MS-based proteomic analysis is described in the Materials and Methods section.

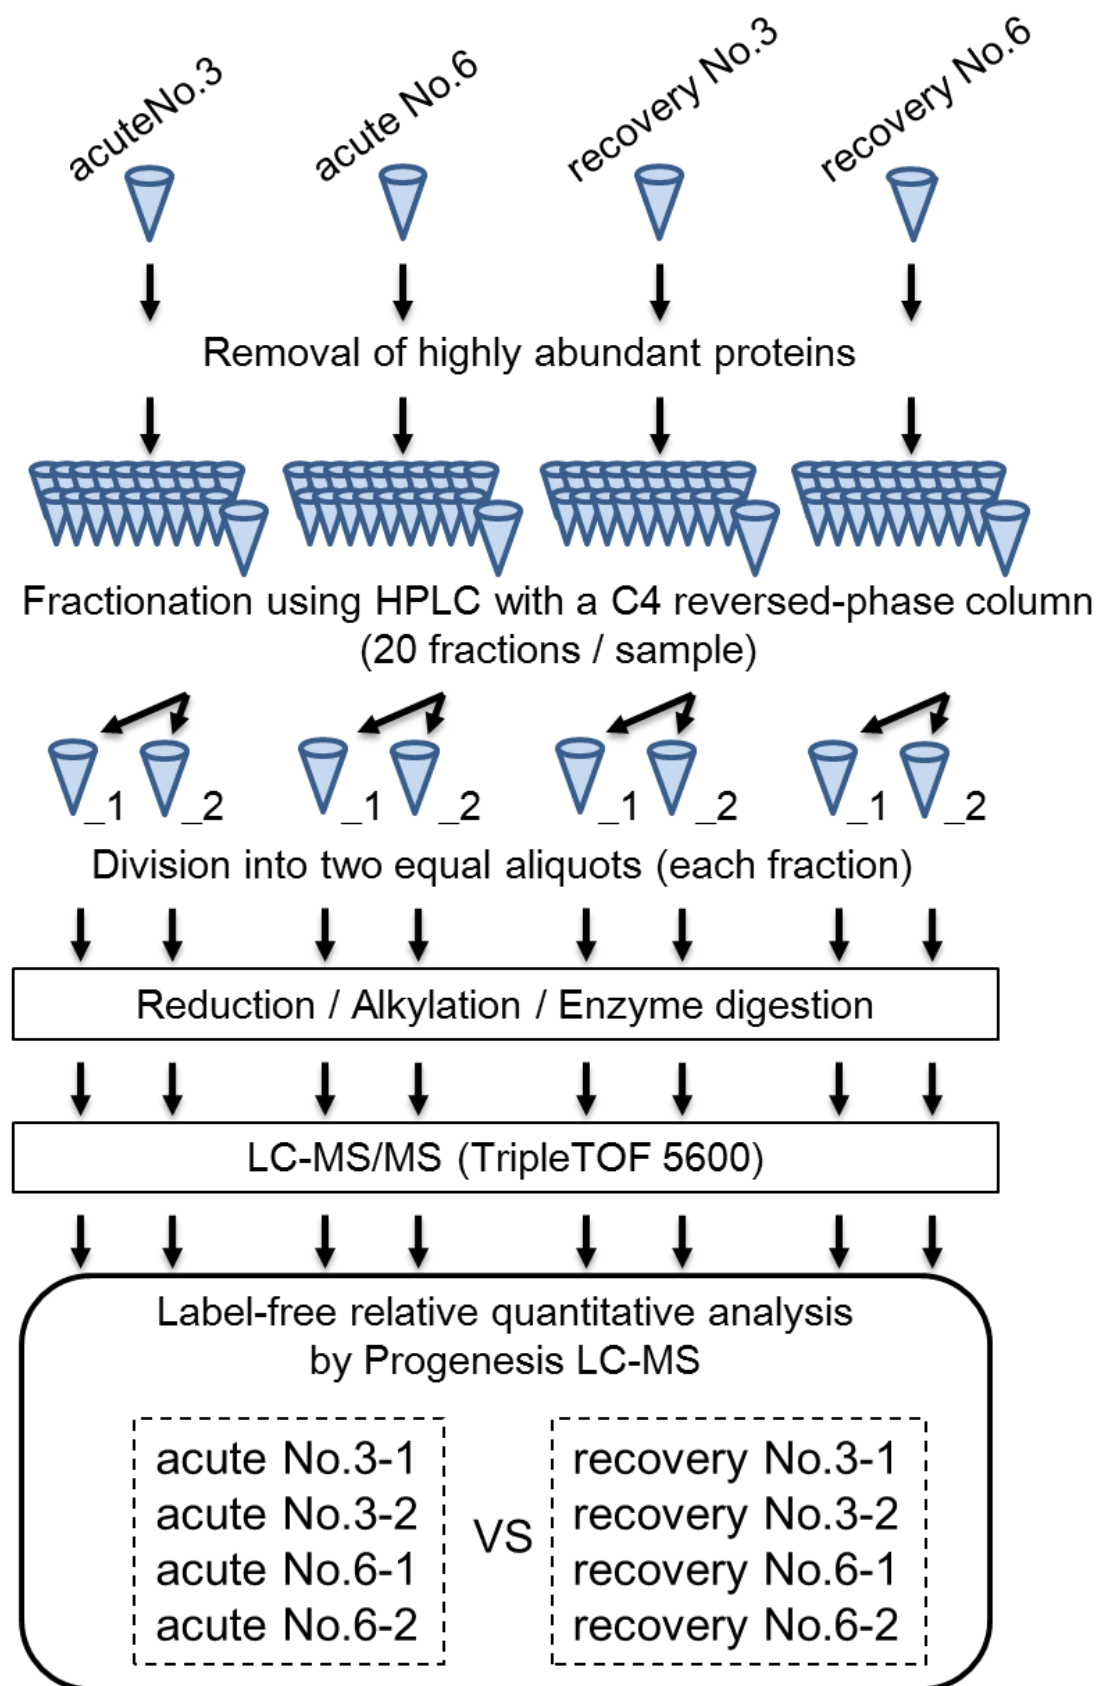

**Figure S2. The full-length gels/blots of the cropped gels/blots in fig 1**

The dotted lines indicate the cropped area for Figure 1.

M; molecular weight size marker

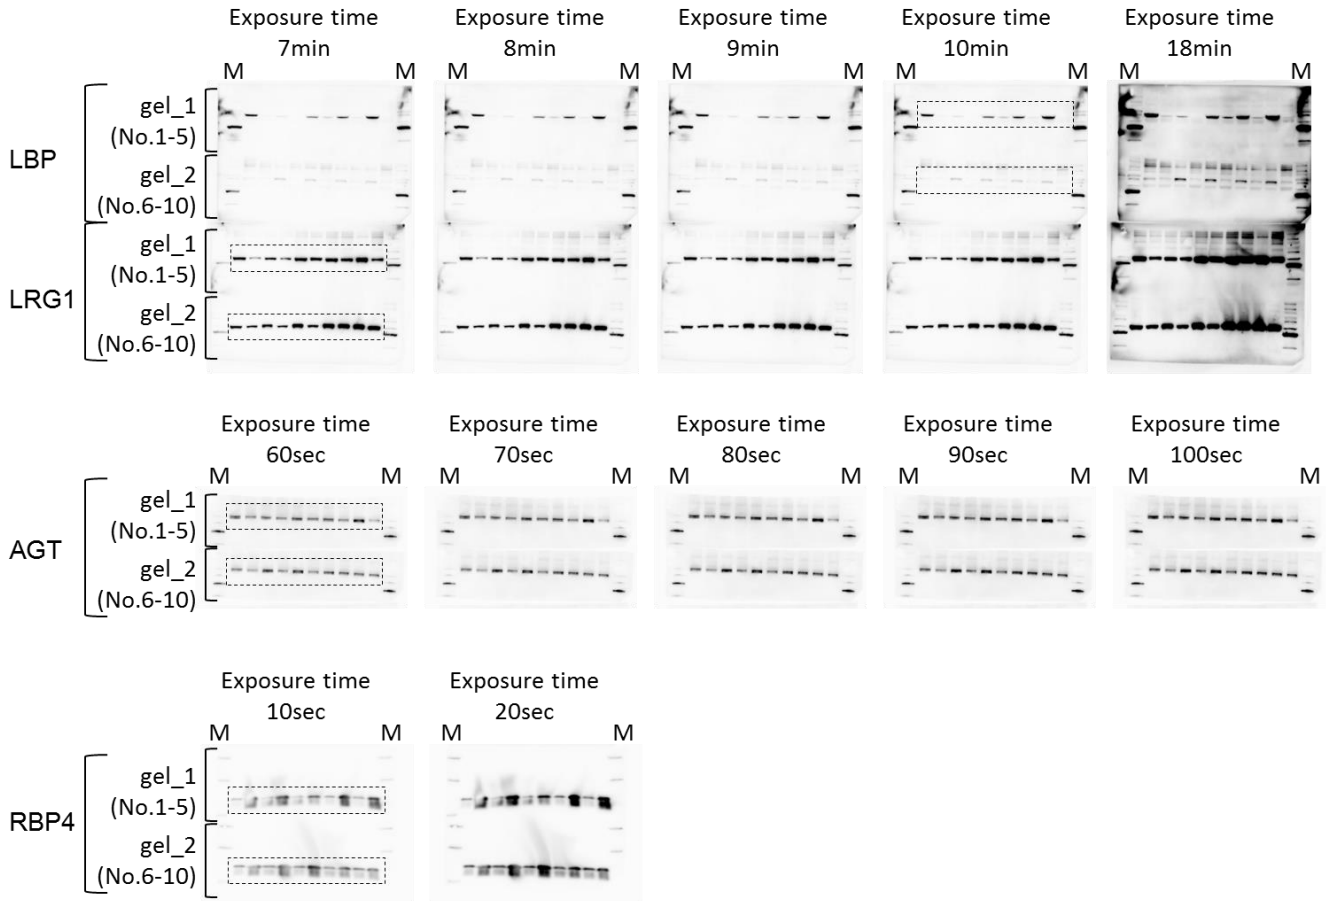

The dotted lines indicate the cropped area for Figure 1.  
M; molecular weight size marker

### Figure S3. Performance of candidate biomarkers in monitoring of the acute and recovery phase of KD

The diagnostic performance of those proteins was measured using ROC curve analysis for the acute phase of KD (55 sera) versus the recovery phase (51 sera).

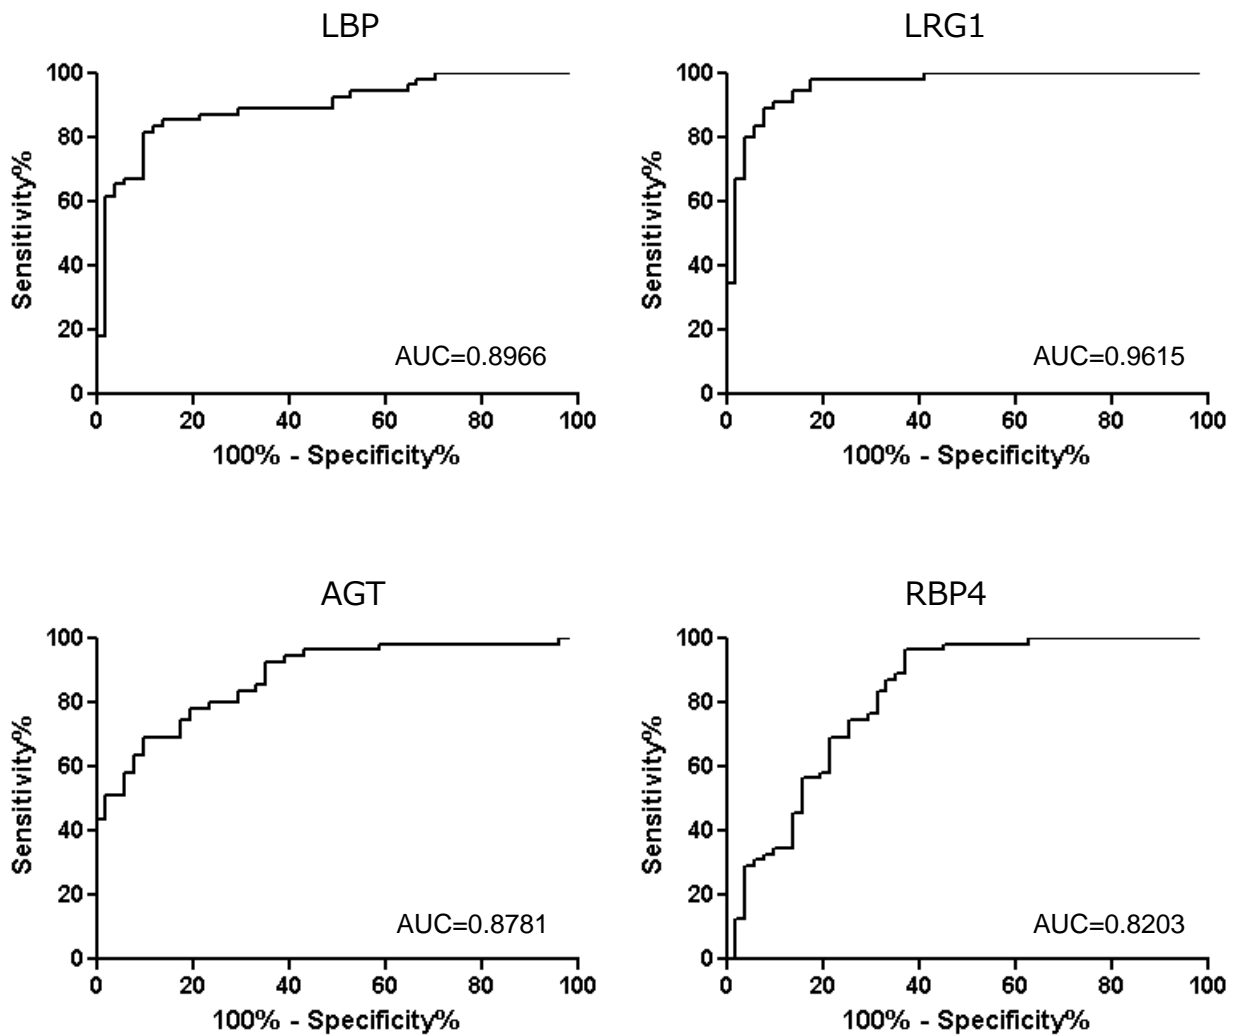

## Figure S4. Diagnostic performance of candidate biomarkers in children under 5 years of age

The diagnostic performance of those proteins was measured using ROC curve analysis for the acute phase of KD (53 sera) versus the recovery phase of KD (50 sera) (a solid line) or control group (99 sera) (a dotted line).

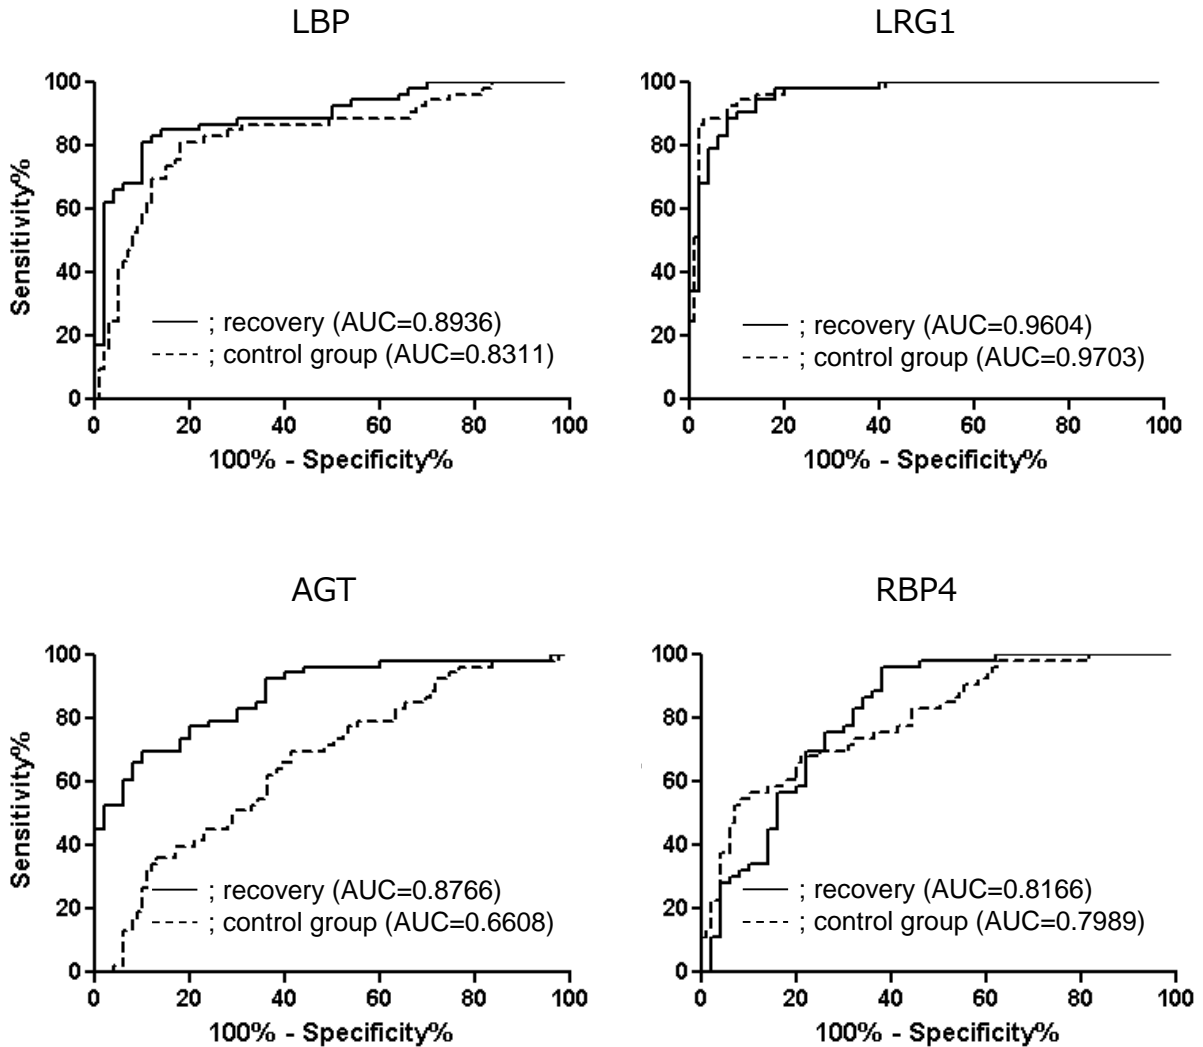

**Figure S5. SDS-PAGE of crude and depleted serum samples.**

The proteins were separated by 12.5% acrylamide gel. After electrophoresis, gel was stained by Oriole fluorescent gel stain. Asterisk indicates the typical high abundant proteins (\*; albumin, \*\*; IgG heavy chain, \*\*\*; IgG light chain).

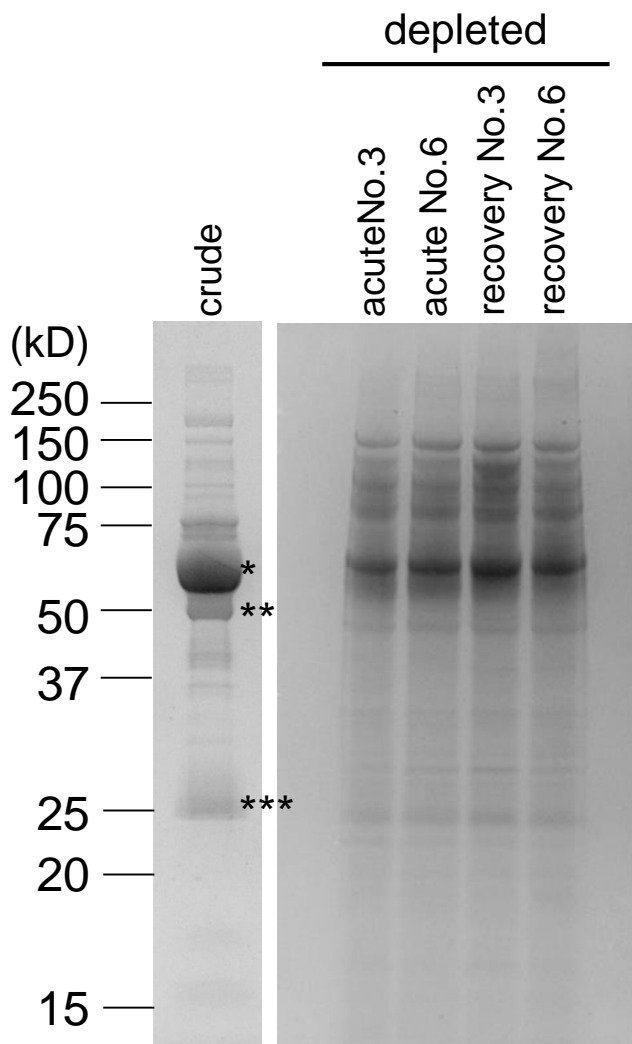

**Table S1. Description of patients with KD.**

|       | Patient No. | Days | Dose of IVIG(g/kg) | Age years | Sex | MS-based analysis* | Western blot analysis* |
|-------|-------------|------|--------------------|-----------|-----|--------------------|------------------------|
| acute | 1           | 7    | 4                  | 5         | M   |                    | ○                      |
|       | 2           | 10   | 4                  | 5         | F   |                    | ○                      |
|       | 3           | 7    | 3                  | 5         | M   | ○                  | ○                      |
|       | 4           | 8    | 4                  | 2         | M   |                    | ○                      |
|       | 5           | 5    | 2                  | 0         | M   |                    | ○                      |
|       | 6           | 8    | 4                  | 2         | M   | ○                  | ○                      |
|       | 7           | 5    | 2                  | 3         | M   |                    | ○                      |
|       | 8           | 5    | 2                  | 3         | M   |                    | ○                      |
|       | 9           | 4    | -                  | 2         | M   |                    | ○                      |
|       | 10          | 4    | 2                  | 2         | M   |                    | ○                      |
|       | 11          | 9    | 2                  | 0         | M   |                    |                        |
|       | 12          | 5    | 2                  | 2         | F   |                    |                        |
|       | 13          | 6    | 2                  | 0         | M   |                    |                        |
|       | 14          | 2    | 2                  | 0         | F   |                    |                        |
|       | 15          | 3    | 2                  | 1         | F   |                    |                        |
|       | 16          | 6    | 2                  | 1         | M   |                    |                        |
|       | 17          | 3    | 2                  | 2         | M   |                    |                        |
|       | 18          | 5    | 2                  | 5         | F   |                    |                        |
|       | 19          | 4    | 2                  | 3         | M   |                    |                        |
|       | 20          | 2    | 2                  | 0         | M   |                    |                        |
|       | 21          | 2    | 2                  | 12        | F   |                    |                        |
|       | 22          | 6    | 4                  | 1         | M   |                    |                        |
|       | 23          | 3    | 2                  | 1         | M   |                    |                        |
|       | 24          | 4    | 4                  | 3         | F   |                    |                        |
|       | 25          | 6    | 2                  | 4         | F   |                    |                        |
|       | 26          | 5    | 2                  | 4         | F   |                    |                        |
|       | 27          | 7    | 4                  | 1         | M   |                    |                        |
|       | 28          | 5    | 2                  | 4         | F   |                    |                        |
|       | 29          | 4    | 2                  | 3         | F   |                    |                        |
|       | 30          | 4    | 2                  | 1         | F   |                    |                        |
|       | 31          | 5    | 4                  | 0         | M   |                    |                        |
|       | 32          | 4    | 2                  | 3         | F   |                    |                        |
|       | 33          | 3    | 2                  | 0         | M   |                    |                        |
|       | 34          | 6    | 4                  | 2         | F   |                    |                        |
|       | 35          | 5    | 4                  | 1         | F   |                    |                        |
|       | 36          | 3    | -                  | 1         | M   |                    |                        |
|       | 37          | 4    | 2                  | 4         | M   |                    |                        |
|       | 38          | 3    | 4                  | 2         | M   |                    |                        |
|       | 39          | 5    | 2                  | 1         | M   |                    |                        |
|       | 40          | 4    | 2                  | 4         | M   |                    |                        |
|       | 41          | 3    | 2                  | 0         | F   |                    |                        |
|       | 42          | 6    | 2                  | 5         | F   |                    |                        |
|       | 43          | 6    | 3                  | 2         | M   |                    |                        |
|       | 44          | 10   | 3                  | 3         | F   |                    |                        |
|       | 45          | 9    | 4                  | 5         | F   |                    |                        |

|    |    |   |   |   |
|----|----|---|---|---|
| 46 | 10 | 3 | 3 | F |
| 47 | 9  | 4 | 2 | F |
| 48 | 3  | 2 | 3 | F |
| 49 | 5  | 2 | 0 | M |
| 50 | 6  | 2 | 4 | F |
| 51 | 4  | 4 | 6 | M |
| 52 | 4  | 2 | 2 | F |
| 53 | 3  | 4 | 3 | M |
| 54 | 5  | 2 | 2 | F |
| 55 | 8  | 2 | 1 | M |

---

|          |    |    |   |    |   |   |   |
|----------|----|----|---|----|---|---|---|
| recovery | 1  | 16 | 4 | 5  | M |   | ○ |
|          | 2  | 18 | 4 | 5  | F |   | ○ |
|          | 3  | 13 | 3 | 5  | M | ○ | ○ |
|          | 4  | 16 | 4 | 2  | M |   | ○ |
|          | 5  | 16 | 2 | 0  | M |   | ○ |
|          | 6  | 14 | 4 | 2  | M | ○ | ○ |
|          | 7  | 25 | 2 | 3  | M |   | ○ |
|          | 8  | 17 | 2 | 3  | M |   | ○ |
|          | 9  | 8  | - | 2  | M |   | ○ |
|          | 10 | 8  | 2 | 2  | M |   | ○ |
|          | 11 | 12 | 2 | 0  | M |   |   |
|          | 12 | 9  | 2 | 2  | F |   |   |
|          | 13 | 12 | 2 | 0  | M |   |   |
|          | 14 | 5  | 2 | 0  | F |   |   |
|          | 15 | 7  | 2 | 1  | F |   |   |
|          | 16 | 12 | 2 | 1  | M |   |   |
|          | 17 | 8  | 2 | 2  | M |   |   |
|          | 18 | 9  | 2 | 5  | F |   |   |
|          | 19 | 7  | 2 | 3  | M |   |   |
|          | 20 | 7  | 2 | 0  | M |   |   |
|          | 21 | 7  | 2 | 12 | F |   |   |
|          | 22 | 15 | 4 | 1  | M |   |   |
|          | 23 | 7  | 2 | 1  | M |   |   |
|          | 24 | 8  | 4 | 3  | F |   |   |
|          | 25 | 9  | 2 | 4  | F |   |   |
|          | 26 | 9  | 2 | 4  | F |   |   |
|          | 27 | 13 | 4 | 1  | M |   |   |
|          | 28 | 9  | 2 | 4  | F |   |   |
|          | 29 | 7  | 2 | 3  | F |   |   |
|          | 30 | 10 | 2 | 1  | F |   |   |
|          | 31 | 14 | 4 | 0  | M |   |   |
|          | 32 | 12 | 2 | 3  | F |   |   |
|          | 33 | 9  | 2 | 0  | M |   |   |
|          | 34 | 10 | 4 | 2  | F |   |   |
|          | 35 | 9  | 4 | 1  | F |   |   |
|          | 36 | 31 | - | 1  | M |   |   |
|          | 37 | 8  | 2 | 4  | M |   |   |
|          | 38 | 9  | 4 | 2  | M |   |   |

|    |    |   |   |   |
|----|----|---|---|---|
| 39 | 12 | 2 | 1 | M |
| 40 | 7  | 2 | 4 | M |
| 41 | 7  | 2 | 0 | F |
| 42 | 10 | 2 | 5 | F |
| 56 | 19 | 4 | 5 | F |
| 57 | 15 | 3 | 4 | M |
| 58 | 14 | 4 | 2 | F |
| 59 | 30 | 4 | 3 | M |
| 60 | 22 | 4 | 0 | M |
| 61 | 32 | 6 | 0 | M |
| 62 | 10 | 2 | 0 | M |
| 63 | 9  | 2 | 4 | F |
| 64 | 7  | 2 | 4 | M |

---

The asterisk indicates the serum samples of patients provided in each analysis.



**Table S3. Description of patients with other illnesses and healthy subjects.**

| Group                  | Patient No. | Infection    |          | Disease | Age | Sex |   |
|------------------------|-------------|--------------|----------|---------|-----|-----|---|
|                        |             | Virus        | Bacteria |         |     |     |   |
| G1;<br>Viral infection | 1           | RS           |          |         | 1   | F   |   |
|                        | 2           | Influenzae A |          |         | 11  | F   |   |
|                        | 3           | Influenzae A |          |         | 2   | F   |   |
|                        | 4           | Influenzae A |          |         | 8   | M   |   |
|                        | 5           | Influenzae A |          |         | 8   | M   |   |
|                        | 6           | Influenzae A |          |         | 9   | F   |   |
|                        | 7           | Influenzae A |          |         | 4   | M   |   |
|                        | 8           | Influenzae A |          |         | 2   | F   |   |
|                        | 9           | Influenzae A |          |         | 6   | M   |   |
|                        | 10          | Influenzae A |          |         | 0   | M   |   |
|                        | 11          | Influenzae A |          |         | 9   | F   |   |
|                        | 12          | Influenzae A |          |         | 10  | M   |   |
|                        | 13          | Influenzae A |          |         | 12  | M   |   |
|                        | 14          | Influenzae A |          |         | 0   | M   |   |
|                        | 15          | Influenzae A |          |         | 4   | F   |   |
|                        | 16          | Influenzae A |          |         | 2   | M   |   |
|                        | 17          | Influenzae A |          |         | 1   | M   |   |
|                        | 18          | Influenzae A |          |         | 2   | M   |   |
|                        | 19          | Influenzae A |          |         | 1   | F   |   |
|                        | 20          | Influenzae A |          |         | 15  | F   |   |
|                        | 21          | Influenzae A |          |         | 4   | M   |   |
|                        | 22          | Influenzae A |          |         | 0   | M   |   |
|                        | 23          | Influenzae A |          |         | 2   | M   |   |
|                        | 24          | Influenzae A |          |         | 1   | M   |   |
|                        | 25          | Influenzae B |          |         | 4   | M   |   |
|                        | 26          | Influenzae B |          |         | 10  | F   |   |
|                        | 27          | Influenzae B |          |         | 6   | M   |   |
|                        | 28          | Influenzae B |          |         | 7   | M   |   |
|                        | 29          | Influenzae B |          |         | 6   | F   |   |
|                        | 30          | Influenzae B |          |         | 10  | M   |   |
|                        | 31          | Influenzae B |          |         | 13  | F   |   |
|                        | 32          | Influenzae B |          |         | 6   | F   |   |
|                        | 33          | Influenzae B |          |         | 8   | M   |   |
|                        | 34          | Influenzae B |          |         | 11  | F   |   |
|                        | 35          | Influenzae B |          |         | 4   | F   |   |
|                        | 36          | Influenzae B |          |         | 14  | M   |   |
|                        | 37          | Influenzae B |          |         | 9   | M   |   |
|                        | 38          | Influenzae B |          |         | 14  | M   |   |
|                        | 39          | Influenzae B |          |         | 12  | F   |   |
|                        | 40          | Influenzae B |          |         | 10  | M   |   |
|                        | 41          | Influenzae B |          |         | 5   | F   |   |
|                        | 42          | Influenzae B |          |         | 7   | F   |   |
|                        | 43          | Influenzae B |          |         | 6   | M   |   |
|                        | 44          | Influenzae B |          |         | 3   | M   |   |
|                        | 45          |              | Rota     |         |     | 0   | M |
|                        | 46          |              | Rota     |         |     | 6   | M |

|    |       |   |   |
|----|-------|---|---|
| 47 | Rota  | 1 | F |
| 48 | Rota  | 1 | M |
| 49 | Rota  | 1 | M |
| 50 | Rota  | 7 | M |
| 51 | Rota  | 1 | M |
| 52 | Rota  | 0 | M |
| 53 | Rota  | 1 | F |
| 54 | Rota  | 0 | M |
| 55 | Rota  | 1 | M |
| 56 | Rota  | 4 | M |
| 57 | Rota  | 2 | F |
| 58 | Rota  | 2 | M |
| 59 | Rota  | 0 | M |
| 60 | Rota  | 1 | F |
| 61 | Rota  | 2 | M |
| 62 | Rota  | 2 | M |
| 63 | Rota  | 1 | M |
| 64 | Rota  | 1 | F |
| 65 | Noro  | 3 | M |
| 66 | Noro  | 0 | M |
| 67 | Noro  | 1 | M |
| 68 | Noro  | 8 | M |
| 69 | Noro  | 1 | M |
| 70 | Noro  | 0 | M |
| 71 | Noro  | 1 | F |
| 72 | Adeno | 2 | F |
| 73 | Adeno | 0 | F |
| 74 | Adeno | 1 | M |
| 75 | Adeno | 1 | M |
| 76 | Adeno | 3 | M |
| 77 | Adeno | 1 | F |
| 78 | Adeno | 7 | F |
| 79 | Adeno | 5 | M |
| 80 | Adeno | 6 | M |
| 81 | Adeno | 1 | F |
| 82 | Adeno | 1 | M |
| 83 | Adeno | 1 | F |
| 84 | Adeno | 1 | F |
| 85 | Adeno | 5 | M |
| 86 | Adeno | 5 | M |
| 87 | RS    | 3 | F |
| 88 | RS    | 0 | M |
| 89 | RS    | 1 | F |
| 90 | RS    | 0 | F |
| 91 | RS    | 0 | M |
| 92 | RS    | 0 | F |
| 93 | RS    | 0 | M |
| 94 | RS    | 0 | M |
| 95 | RS    | 0 | F |

|                               |     |                                      |                                                 |    |   |
|-------------------------------|-----|--------------------------------------|-------------------------------------------------|----|---|
|                               | 96  | RS                                   |                                                 | 10 | M |
|                               | 97  | RS                                   |                                                 | 0  | M |
|                               | 98  | RS                                   |                                                 | 0  | F |
|                               | 99  | RS                                   |                                                 | 0  | F |
|                               | 100 | RS                                   |                                                 | 0  | M |
|                               | 101 | RS                                   |                                                 | 0  | F |
|                               | 102 | RS                                   |                                                 | 0  | F |
|                               | 103 | RS                                   |                                                 | 0  | F |
|                               | 104 | RS                                   |                                                 | 0  | M |
|                               | 105 | RS                                   |                                                 | 2  | M |
|                               | 106 | RS                                   |                                                 | 1  | F |
| <hr/>                         |     |                                      |                                                 |    |   |
| G2;<br>Bacterial<br>infection | 107 |                                      | Serratia marcescens                             | 17 | M |
|                               | 108 |                                      | Streptococcus<br>pneumoniae                     | 17 | F |
|                               | 109 |                                      | Escherichia coli                                | 8  | F |
|                               | 110 |                                      | Clostridium difficile                           | 7  | F |
|                               | 111 |                                      | Clostridium difficile                           | 15 | F |
|                               | 112 |                                      | Streptococcus<br>pyogenes                       | 5  | M |
|                               | 113 |                                      | Streptococcus<br>pyogenes                       | 4  | F |
|                               | 114 |                                      | Streptococcus<br>pyogenes                       | 7  | M |
|                               | 115 |                                      | Streptococcus<br>pyogenes                       | 9  | F |
|                               | 116 |                                      | Streptococcus<br>pyogenes                       | 6  | M |
|                               | 117 |                                      | Streptococcus<br>pyogenes                       | 10 | M |
|                               | 118 |                                      | Streptococcus<br>pyogenes                       | 7  | M |
|                               | 119 |                                      | Escherichia coli                                | 0  | M |
|                               | 120 |                                      | Escherichia coli                                | 0  | F |
|                               | 121 |                                      | Staphylococcus<br>epidermidis                   | 0  | M |
|                               | 122 |                                      | Escherichia coli                                | 0  | M |
|                               | 123 |                                      | Staphylococcus<br>aureus (MSSA)                 | 11 | F |
| 124                           |     | Staphylococcus<br>aureus (MSSA)      | 7                                               | F  |   |
| 125                           |     | Micrococcus                          | 14                                              | M  |   |
| 126                           |     | Stapyylococcus<br>epidermidis (MSSE) | 0                                               | M  |   |
| 127                           |     | Klebsiella                           | 0                                               | F  |   |
| <hr/>                         |     |                                      |                                                 |    |   |
| G3;<br>Autoimmune<br>disease  | 128 |                                      | Idiopathic<br>thrombocytopenic<br>purpura (ITP) | 2  | M |
|                               | 129 |                                      | ITP                                             | 3  | F |
|                               | 130 |                                      | ITP                                             | 4  | M |

|                 |     |                                                         |    |   |
|-----------------|-----|---------------------------------------------------------|----|---|
|                 | 131 | Juvenile<br>idiopathic arthritis                        | 18 | F |
|                 | 132 | JIA                                                     | 11 | F |
|                 | 133 | Graft versus host<br>disease (GVHD)<br>Virus-associated | 3  | F |
|                 | 134 | hemophagocytic<br>syndrome                              | 2  | M |
|                 | 135 | JIA                                                     | 18 | M |
|                 | 136 | JIA                                                     | 12 | F |
|                 | 137 | JIA                                                     | 9  | M |
|                 | 138 | JIA                                                     | 9  | F |
|                 | 139 | JIA                                                     | 15 | F |
|                 | 140 | JIA                                                     | 12 | F |
|                 | 141 | JIA                                                     | 8  | F |
|                 | 142 | JIA                                                     | 7  | F |
|                 | 143 | JIA                                                     | 16 | F |
|                 | 144 | JIA                                                     | 14 | F |
|                 | 145 | JIA                                                     | 4  | F |
|                 | 146 | JIA                                                     | 13 | F |
|                 | 147 | JIA                                                     | 11 | M |
|                 | 148 | JIA                                                     | 10 | F |
|                 | 149 | JIA                                                     | 13 | F |
|                 | 150 | JIA                                                     | 5  | F |
|                 | 151 | JIA                                                     | 16 | F |
| Healthy subject | 152 |                                                         | 4  | F |
|                 | 153 |                                                         | 1  | M |
|                 | 154 |                                                         | 1  | M |
|                 | 155 |                                                         | 6  | F |
|                 | 156 |                                                         | 7  | F |
|                 | 157 |                                                         | 1  | F |
|                 | 158 |                                                         | 5  | F |
|                 | 159 |                                                         | 10 | F |
|                 | 160 |                                                         | 6  | M |
|                 | 161 |                                                         | 4  | M |
|                 | 162 |                                                         | 0  | M |
|                 | 163 |                                                         | 3  | M |
|                 | 164 |                                                         | 6  | F |
